## Insulin Secretion, Sensitivity, and Kidney Function in Young Individuals With Type 2 Diabetes

Petter Bjornstad, Ye Ji Choi, Carson Platnick, Susan Gross, Phoom Narongkiatikhun, Isabella Melena, Lauryn Remmers, Madison Baca, Grant Schutte, Tyler Dobbs, Tim Vigers, Laura Pyle, Lynette Driscoll, Kalie Tommerdahl, Jessica Kendrick, Helen C. Looker, Allison Dart, David Cherney, Daniel H. van Raalte, Anand Srivastava, Luping Li, Pottumarthi Prasad, Pierre Saulnier, Robert G. Nelson, Richard J. Johnson, and Kristen J. Nadeau, on behalf of the Bjornstad Lab

Diabetes Care 2024;47(3):409–417 | <https://doi.org/10.2337/dc23-1818>

### Insulin Secretion, Sensitivity, and Kidney Function in Young Individuals With Type 2 Diabetes

#### Aim

To explore the relationship between  $\beta$ -cell dysfunction, insulin resistance, and kidney function in youth with type 2 diabetes.

#### Participants & Methods

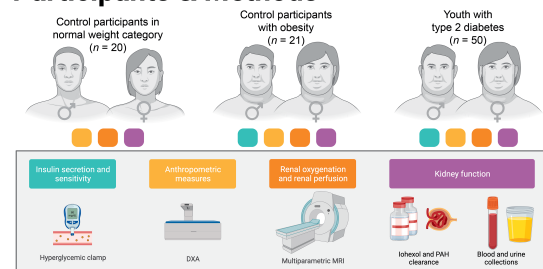

#### Conclusion

Our results suggest a strong association between  $\beta$ -cell dysfunction, insulin resistance, and adverse kidney parameters, indicating a need for early intervention strategies in this population.

GFR, glomerular filtration rate; PAH, p-aminohippurate;  $P_{GLO}$ , glomerular pressure;  $R_A$ , afferent arteriolar resistance;  $R_E$ , efferent arteriolar resistance; RPF, renal plasma flow.

#### Results

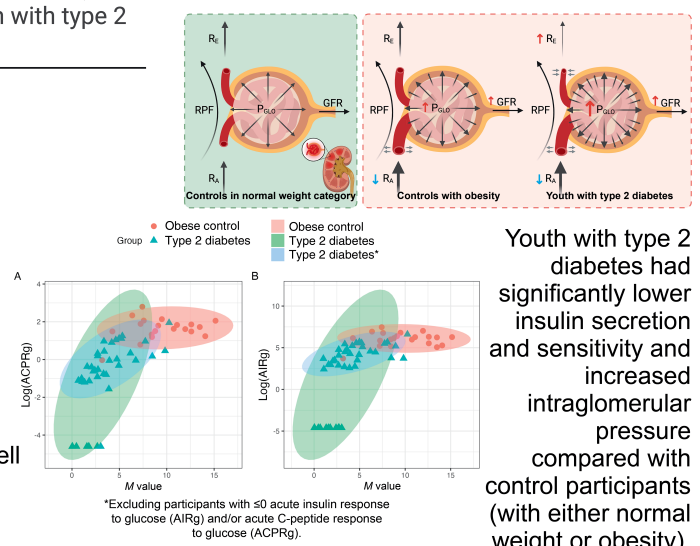

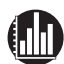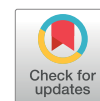

# Insulin Secretion, Sensitivity, and Kidney Function in Young Individuals With Type 2 Diabetes

Diabetes Care 2024;47:409–417 | <https://doi.org/10.2337/dc23-1818>

Petter Bjornstad,<sup>1,2</sup> Ye Ji Choi,<sup>1,3</sup> Carson Platnick,<sup>1</sup> Susan Gross,<sup>1</sup> Phoom Narongkiatikhun,<sup>1</sup> Isabella Melena,<sup>1</sup> Lauryn Remmers,<sup>1</sup> Madison Baca,<sup>1</sup> Grant Schutte,<sup>1</sup> Tyler Dobbs,<sup>1</sup> Tim Vigers,<sup>1,3</sup> Laura Pyle,<sup>1,3</sup> Lynette Driscoll,<sup>1</sup> Kalie Tommerdahl,<sup>1</sup> Jessica Kendrick,<sup>2</sup> Helen C. Looker,<sup>4</sup> Allison Dart,<sup>5,6</sup> David Cherney,<sup>7</sup> Daniel H. van Raalte,<sup>8</sup> Anand Srivastava,<sup>9</sup> Luping Li,<sup>10</sup> Pottumarthi Prasad,<sup>10</sup> Pierre Saulnier,<sup>11</sup> Robert G. Nelson,<sup>4</sup> Richard J. Johnson,<sup>2</sup> and Kristen J. Nadeau,<sup>1</sup> on behalf of the Bjornstad Lab\*

## OBJECTIVE

β-Cell dysfunction and insulin resistance magnify the risk of kidney injury in type 2 diabetes. The relationship between these factors and intraglomerular hemodynamics and kidney oxygen availability in youth with type 2 diabetes remains incompletely explored.

## RESEARCH DESIGN AND METHODS

Fifty youth with type 2 diabetes (mean age ± SD 16 ± 2 years; diabetes duration 2.3 ± 1.8 years; 60% female; median HbA<sub>1c</sub> 6.4% [25th, 75th percentiles 5.9, 7.6%]; BMI 36.4 ± 7.4 kg/m<sup>2</sup>; urine albumin-to-creatinine ratio [UACR] 10.3 [5.9, 58.0] mg/g) 21 control participants with obesity (OCs; age 16 ± 2 years; 29% female; BMI 37.6 ± 7.4 kg/m<sup>2</sup>), and 20 control participants in the normal weight category (NWCs; age 17 ± 3 years; 70% female; BMI 22.5 ± 3.6 kg/m<sup>2</sup>) underwent iohexol and p-aminohippurate clearance to assess glomerular filtration rate (GFR) and renal plasma flow, kidney MRI for oxygenation, hyperglycemic clamp for insulin secretion (acute C-peptide response to glucose [ACPRg]) and disposition index (DI; ×10<sup>3</sup> mg/kg lean/min), and DXA for body composition.

## RESULTS

Youth with type 2 diabetes exhibited lower DI (0.6 [0.0, 1.6] vs. 3.8 [2.4, 4.5] × 10<sup>3</sup> mg/kg lean/min; *P* < 0.0001) and ACPRg (0.6 [0.3, 1.4] vs. 5.3 [4.3, 6.9] nmol/L; *P* < 0.001) and higher UACR (10.3 [5.9, 58.0] vs. 5.3 [3.4, 14.3] mg/g; *P* = 0.003) and intraglomerular pressure (77.8 ± 11.5 vs. 64.8 ± 5.0 mmHg; *P* < 0.001) compared with OCs. Youth with type 2 diabetes and OCs had higher GFR and kidney oxygen availability (relative hyperoxia) than NWCs. DI was associated inversely with intraglomerular pressure and kidney hyperoxia.

## CONCLUSIONS

Youth with type 2 diabetes demonstrated severe β-cell dysfunction that was associated with intraglomerular hypertension and kidney hyperoxia. Similar but attenuated findings were found in OCs.

The rapidly growing rate of youth-onset type 2 diabetes (T2D) in the United States poses a severe public health threat (1), with incidence projected to increase by 600% between 2017 and 2060 (2). Youth-onset T2D displays a more severe phenotype than adult-onset T2D, including more severe insulin resistance (IR), faster deterioration

<sup>1</sup>Section of Endocrinology, Department of Pediatrics, University of Colorado School of Medicine, Aurora, CO

<sup>2</sup>Division of Renal Diseases and Hypertension, Department of Medicine, University of Colorado School of Medicine, Aurora, CO

<sup>3</sup>Department of Biostatistics and Informatics, University of Colorado School of Medicine, Aurora, CO

<sup>4</sup>Chronic Kidney Disease Section, National Institute of Diabetes and Digestive and Kidney Diseases, Phoenix, AZ

<sup>5</sup>Division of Nephrology, Department of Pediatrics, University of Manitoba, Winnipeg, Manitoba, Canada

<sup>6</sup>Children's Hospital Research Institute of Manitoba, Winnipeg, Manitoba, Canada

<sup>7</sup>Division of Nephrology, Department of Medicine, University of Toronto School of Medicine, Toronto, Ontario, Canada

<sup>8</sup>Diabetes Center, Department of Internal Medicine, Vrije Universiteit University Medical Center, Amsterdam University Medical Centers, Amsterdam, the Netherlands

<sup>9</sup>Division of Nephrology, Department of Medicine, University of Illinois Chicago, Chicago, IL

<sup>10</sup>Department of Radiology, NorthShore University HealthSystem, Evanston, IL

<sup>11</sup>INSERM Centre d'Investigation Clinique 1402, CHU Poitiers, University of Poitiers, Poitiers, France

of  $\beta$ -cell function, and a higher rate of early diabetic kidney disease (DKD) when accounting for diabetes duration (3,4). Youth-onset T2D typically emerges during or shortly after puberty in adolescents with obesity. Preventing early  $\beta$ -cell and kidney injury is crucial, because this can be reversible if caught early, and the presence of such injury decreases life span (5). The Restoring Insulin Secretion (RISE) study showed that strategies effective in adults fail in youth. The Treatment Options for Type 2 Diabetes in Adolescents and Youth (TODAY) study found that >50% of youth with T2D experienced glycemic failure within 5 years of diagnosis (6). Traditional risk factors like obesity, hyperglycemia, hypertension, or dyslipidemia do not fully explain youth-onset T2D severity or progression (5,6), highlighting the need to identify modifiable risk factors for targeted interventions to reduce the devastating impacts of this disease, such as intrarenal effects.

The kidneys are metabolically active and have high energy and oxygen requirements to sustain filtration, intraglomerular hemodynamic function, and tubular reabsorption (7). However, in T2D, emerging animal data suggest that the kidneys are not able to sufficiently compensate for the increased oxygen consumption ascribed to the effects of diabetes on substrate metabolism and oxygen use (8,9). Studies of intraglomerular hemodynamic function have focused largely on adults with type 1 diabetes (T1D) and adult-onset T2D (10,11). These studies have established that intraglomerular hemodynamic function is abnormal in early DKD (12) and provide compelling evidence that intraglomerular hemodynamic function can be only partially restored with therapeutic agents early in the course of DKD (13). However, no such data exist for youth-onset T2D, a disease that carries a significantly higher risk of progressive DKD than T1D or adult-onset T2D (14,15). Furthermore, no clinical data exist on the relationships among intraglomerular hemodynamic function, insulin secretion, insulin sensitivity,

kidney perfusion, and oxygen availability in youth with T2D.

Accordingly, the aim of this study was to gain detailed knowledge of the factors underlying early DKD in youth-onset T2D. We enrolled 50 youth with T2D, 21 control participants with obesity (OCs), and 20 control participants in the normal weight category (NWCs) and performed assessments of glomerular filtration rate (GFR) by iothexol clearance, renal plasma flow (RPF) by p-aminohippurate (PAH) clearance, and kidney perfusion and oxygenation by multiparametric kidney MRI. Additionally, we measured insulin secretion and estimated whole-body and adipose insulin sensitivity in youth with T2D and OCs using a hyperglycemic clamp.

## RESEARCH DESIGN AND METHODS

### Study Design and Participants

Adolescents and young adults ( $N = 50$ ) with T2D (age 12–21 years; diabetes onset at age <18 years; diabetes duration 1–10 years;  $HbA_{1c} < 14\%$ ) from the Renal Hemodynamics, Energetics, and Insulin Resistance in Youth Onset Type 2 Diabetes (Renal-HEIR) study were recruited from the T2D clinics at the Children's Hospital Colorado, Anschutz Medical Campus, in Aurora, Colorado. T2D was defined according to the American Diabetes Association criteria plus the absence of glutamic acid decarboxylase, islet cell, zinc transporter 8, and/or insulin autoantibodies. Exclusion criteria are detailed in Supplementary Fig. 1. Medication use was recorded for all participants, and diabetes treatment was at the discretion of their medical provider. Individuals without T2D who were classified as having obesity (OCs,  $N = 21$ ) were enrolled from our Lifestyle Medicine Tier 1 Clinic. Meanwhile, NWCs were identified from the Child Health Clinic at Children's Hospital Colorado ( $N = 20$ ). Research visits were performed at the University of Colorado Clinical and Translational Research Center (CTRC), with fasting in the morning, and preceded by 3 days of restricted physical activity and a fixed-macronutrient and sodium- and protein-replete weight-maintenance diet.

Participants remained fasted until after all study procedures were completed. The Renal-HEIR cohort was approved by the Colorado Multiple Institutional Review Board. Participants or parents provided written informed assent and/or consent as appropriate for age.

### Clinical Measurements and Biochemistry

Blood pressure was measured in seated participants using an automated oscillometric sphygmomanometer on the brachial artery of the nondominant arm after 5 min of rest. Three readings were taken 1 min apart. Systolic and diastolic blood pressure were averaged from these measures.

CTRC Core Laboratories conducted all assays. Insulin was measured using a CLIA-certified chemiluminescent immunoassay (Beckman Coulter). Standard methods were used to assess fasting evaluations, such as free fatty acid (FFA), C-peptide, total cholesterol, LDL, HDL, triglyceride, glucose, and  $HbA_{1c}$  (Diabetes Control and Complications Trial calibrated) levels, in the CTCRC laboratory.

### GFR and RPF by Iothexol and PAH Clearance, eGFR, and UACR

Iothexol was administered through bolus i.v. injection (5 mL of 300 mg/mL; Omnipaque 300; GE Healthcare). Blood collections for iothexol plasma disappearance were drawn at +120, +150, +180, +210, and +240 min (16). The Jødal-Brøchner-Mortensen equation was used to calculate GFR (17). PAH (2 g/10 mL, with a dose of  $[\text{weight in kg}]/75 \times 4.2$  mL; Basic Pharma, Geleen, the Netherlands) was administered slowly over 5 min, followed by a continuous infusion of PAH (32 mg/mL) at a rate of 24 mL/h for 2 h. After an equilibration period, blood was drawn at 90 and 120 min, and RPF was calculated as PAH clearance divided by the estimated extraction ratio of PAH (18).

In adolescents with T2D and OCs, GFR and RPF were measured during mild hyperglycemia (goal blood glucose 190 mg/dL [10.6 mmol/L]) achieved by a modified

Corresponding author: Petter Bjornstad, petter.m.bjornstad@cuanschutz.edu

Received 27 September 2023 and accepted 3 December 2023

Clinical trial reg. no. NCT03584217, clinicaltrials.gov

This article contains supplementary material online at <https://doi.org/10.2337/figshare.24726048>.

R.J.J. and K.J.N. contributed equally to this work as senior authors.

\*A complete list of Bjornstad Lab members can be found in the APPENDIX.

© 2024 by the American Diabetes Association. Readers may use this article as long as the work is properly cited, the use is educational and not for profit, and the work is not altered. More information is available at <https://www.diabetesjournals.org/journals/pages/license>.

hyperglycemic clamp with paired 20% dextrose, chosen to control for glycemic differences between the two groups and maintain steady-state glycemic concentrations during renal measures (13). In NWCs, GFR and RPF were measured during fasting without glucose control to represent normal physiology. Iohexol and PAH measurements were performed using high-performance liquid chromatography (Waters, Milford, MA) at the National Institute of Diabetes and Digestive and Kidney Diseases laboratory in Phoenix, Arizona, as described previously (19). By using measurements of GFR, RPF, hematocrit, and total protein, we calculated afferent and efferent arteriolar resistance and intraglomerular pressure by Gomez equations (10,20). We also calculated renal vascular resistance (mean arterial pressure/renal blood flow).

The full age spectrum serum creatinine and cystatin C equation was used to determine estimated GFR (eGFR) (21). Hyperfiltration by eGFR was defined as  $eGFR \geq 135 \text{ mL/min/1.73 m}^2$ , which represents 2 SDs above the mean for healthy youth in NHANES, and hyperfiltration by measured GFR (mGFR) was defined as  $mGFR \geq 2$  SDs above the mean of mGFR in NWCs in Renal-HEIR.

The urine albumin-to-creatinine ratio (UACR) was calculated as urine albumin (mg)/urine creatinine (g) measured during fasting from spot urine samples before and after renal clearance assessment and averaged. Participants with average UACR  $\geq 30 \text{ mg/g}$  were considered to have elevated albuminuria.

#### Insulin Secretion and Whole-Body and Adipose Insulin Sensitivity by Modified Hyperglycemic Clamp (youth with T2D and OCs only)

A hyperglycemic clamp was performed in participants with T2D and those with obesity without diabetes (i.e., OCs) to determine insulin secretion and insulin sensitivity. A 20% dextrose infusion was titrated to maintain hyperglycemia ( $\sim 190\text{--}200 \text{ mg/dL}$ ) (22,23) for 240 min while participants rested in bed, based on bedside glucose readings every 10 min from a heated arterialized hand vein, similarly to our previous studies (24,25). Glucose was measured at bedside using a Stat Strip glucometer (Nova Biomedical) based on the glucose oxidase technique. Insulin, FFA, and C-peptide measurements were collected at baseline ( $-10$

and  $-5 \text{ min}$ ), during the 10 min after an i.v. bolus of 20% dextrose with a target of achieving  $190\text{--}200 \text{ mg/dL}$ , and every 10 min during the steady state from 190 to 240 min. To assess first-phase insulin secretion in response to acute hyperglycemia, the acute insulin response to glucose (AIRg) was calculated as the incremental area under the curve for insulin levels during the first 10 min after glucose infusion using the trapezoidal rule. Similarly, the acute C-peptide response to glucose (ACPRg) was estimated by computing the incremental area under the curve for C-peptide levels during the same initial 10-min period. Both calculations subtracted the basal (preinfusion) insulin and C-peptide levels, respectively. The  $M$  value, an index of glucose disposal rate used to assess insulin sensitivity, was calculated from the mean glucose infusion rate during the steady state of the hyperglycemic clamp, adjusted for body weight ( $\text{mg/kg/min}$ ) and lean body mass from DXA ( $\text{mg/lean kg/min}$ ). A measure of insulin sensitivity normalized by steady-state insulin was then calculated by dividing the  $M$  value by the mean plasma insulin concentration during the steady-state period of the clamp ( $M/I$ ). The disposition index (DI), a measure of the adequacy of insulin secretion relative to insulin sensitivity, was estimated as the product of the AIRg and the  $M/I$  index. Finally, adipose tissue insulin sensitivity was evaluated by assessing the suppression of FFAs during the hyperglycemic clamp. The extent of FFA suppression was calculated as the percentage decrease in FFA concentration from baseline to the steady-state period of the clamp, divided by the steady-state insulin concentration.

To allow a common measure of insulin sensitivity in all participants, we also estimated insulin sensitivity by an equation we previously validated against the hyperinsulinemic-euglycemic clamp: estimated insulin sensitivity =  $\exp(4.64725 - 0.02032 [\text{waist (cm)}] - 0.09779 [\text{HbA}_{1c} (\%)] - 0.00235 [\text{triglycerides (mg/dL)}])$ .

#### Body Composition by DXA

Participants underwent DXA by standard methods on a Hologic device (Waltham, MA) to determine lean and fat mass.

#### Multiparametric and Functional Kidney MRI

All participants underwent a multiparametric kidney MRI scan on a Skyra Siemens 3T scanner at our Research Imaging Center. The scanning protocol included blood oxygen level-dependent (BOLD) MRI to estimate fractional oxygen availability (apparent relaxation rate  $R2^* [s^{-1}]$ ) (26). A multiple gradient-recalled echo sequence was used to acquire BOLD images in the coronal plane during breath hold at end expiration, before and after administration of the diuretic furosemide (20-mg i.v. injection). To account for variations in weight-based dosing, we adjusted for weight differences across the three groups. The higher the local deoxyhemoglobin level in the blood, the higher the  $R2^*$  and the lower the local tissue oxygen content. The change in fractional renal oxygen availability ( $R2^*$ ) in response to furosemide provides an estimate of the oxygen-dependent tubular transport of sodium and renal oxygen consumption, called furosemide-suppressible oxygen consumption (FSOC). Participants also underwent pseudocontinuous arterial spin labeling MRI (pCASL) to measure renal perfusion ( $\text{mL/min/100 g}$ ). The images were analyzed at the Prasad imaging laboratory at NorthShore, and the reader was blinded to the participants' clinical data.

#### Statistical Analysis

Participant characteristics were summarized as count and percentage, mean and SD, or median (25th, 75th percentiles) based on visual inspection of histograms for distribution. NWC, OC, and youth with T2D groups were compared using the  $\chi^2$  or Fisher exact test for categorical variables or the ANOVA or Kruskal-Wallis test for continuous variables. Pairwise comparisons were tested using the Tukey honestly significant differences test or Dunn test of multiple comparisons. Multiple linear regression was used to assess differences in kidney structure and function parameters between groups adjusting for sex,  $\text{HbA}_{1c}$ , and race/ethnicity. Pearson and Spearman correlations were computed based on distribution among clamp, MRI, and DXA parameters. Correlations were visually inspected with scatter plots, and interactions between groups were tested. Group differences were also evaluated after excluding participants who indicated



use of renin-angiotensin-aldosterone system (RAAS) and/or sodium-glucose cotransporter 2 (SGLT2) inhibitors as a sensitivity analysis. A *P* value of <0.05 was considered statistically significant. Analyses were performed using Python v.3.9.6 and R v.4.2.2.

## RESULTS

### Clinical Characteristics of Cohort

Participants were similar in age, but there were more girls and young women in the youth with T2D and NWC groups compared with in the OC group (Table 1). Both the youth with T2D and OC groups had greater representation of Latinos compared with the NWC group. The youth with T2D and OC groups exhibited greater BMI and systolic blood pressure compared with the NWC group. As expected, youth with T2D demonstrated the highest mean HbA<sub>1c</sub> and also had the highest eGFR and median UACR among the three groups. Among youth with T2D, 90% had been prescribed metformin, 36% insulin, 26% SGLT2 inhibitors, 16% pioglitazone, 12% RAAS inhibitors, and 2% statins. Ten percent of OCs had also been prescribed RAAS inhibitors. NWCs had not been prescribed any of these medications.

### Body Composition and Whole-Body and Adipose Insulin Sensitivity

Using DXA, we found that OCs had the highest lean, fat mass, trunk mass, and body fat percentages among the three groups (Table 2). Both OCs and youth with T2D had significantly higher values for these parameters than NWCs (*P* < 0.0001). The differences in DXA parameters between OCs and youth with T2D were not statistically significant.

Only OCs and youth with T2D underwent the hyperglycemic clamp procedure, and therefore, any comparison in clamp-derived parameters is limited to these two groups. Fasting FFA and insulin levels were similar between OCs and youth with T2D (Table 2). FFA suppression was lower in youth with T2D versus OCs (66.6% [36.1, 85.5%] vs. 93.5% [91.4, 94.9%]; *P* < 0.0001). Likewise, insulin sensitivity (*M* value  $3.6 \pm 2.7$  vs.  $9.6 \pm 3.3$  mg/kg lean/min; *P* < 0.0001), insulin secretion in the form of AIRg (31.8 [0.0, 113.0] vs. 471.0 [250.8, 591.0] pmol/L; *P* < 0.0001), steady-

state insulin and C-peptide, and DI ( $0.6$  [0.0, 1.6] vs.  $3.8$  [2.4, 4.5]  $\times 10^3$  mg/kg lean/min; *P* < 0.0001) were lower in youth with T2D compared with OCs (Table 2). Supplementary Fig. 2 illustrates the relationships between insulin secretion and sensitivity measures in OCs and youth with T2D. OCs generally maintained consistent insulin secretion across a broad range of insulin sensitivities. In contrast, youth with T2D with lower insulin sensitivity also tended to demonstrate diminished insulin secretion. Notably, a subset of youth with T2D showed negligible insulin and/or C-peptide responses to hyperglycemia, indicating severe  $\beta$ -cell dysfunction. Insulin sensitivity normalized by steady-state insulin was similar between youth with T2D and OCs, which underscores the difference in insulin concentrations between these two groups during the hyperglycemic clamp (Table 2).

### Measured GFR and RPF and Intraglomerular Hemodynamic Parameters

Both youth with T2D and OCs exhibited glomerular hyperfiltration, and absolute and BSA-indexed GFR and RPF were higher in these groups compared with in NWCs (Table 2). Intraglomerular pressure was highest in youth with T2D, followed by OCs and NWCs ( $78 \pm 12$  vs.  $65 \pm 5$  vs.  $56 \pm 5$  mmHg; *P* < 0.0001). This difference was statistically significant between youth with T2D and OCs and NWCs, but not between OCs and NWCs. Afferent arteriolar resistance was also lower in youth with T2D and OCs compared with NWCs, and efferent arteriolar resistance was higher in youth with T2D (Table 2 and Supplementary Fig. 3). All observations in group differences remained the same in the sensitivity analysis excluding participants using RAAS and/or SGLT2 inhibitors.

### Kidney Structure and Function Parameters by Multiparametric MRI

Average kidney perfusions of the left and right kidneys were numerically higher in youth with T2D versus OCs and NWCs, although the differences were not statistically significant (Table 2). Right and left fractional cortical and medullary oxygen availability (R2\*) were lower in youth with T2D and OCs compared with in NWCs (but not between youth with T2D and OCs), suggestive of

higher oxygen availability (relative hyperoxia) in youth with T2D and OCs. Group differences remained statistically significant in the sensitivity analysis excluding participants using RAAS and/or SGLT2 inhibitors.

Participants with T2D exhibited the highest FSOC after adjusting for weight, but this did not reach statistical significance after adjustments for multiple comparisons.

### Associations Among Insulin Secretion, Insulin Sensitivity, and Kidney Function and Energetics

In all participants, fat mass, trunk mass, and body fat percentage correlated positively with intraglomerular pressure (Fig. 1 and Supplementary Fig. 4). Across the three groups, fractional cortical and medullary oxygen availability (R2\*) and FSOC were associated inversely with fat mass, trunk mass, and body fat percentage.

We did not identify a significant statistical interaction between diabetes status and kidney parameters in youth with T2D and OCs, which justified their combined analysis irrespective of diabetes status. In analyses limited to youth with T2D and OCs, higher fat and trunk mass correlated strongly with higher GFR, RPF, fractional cortical and medullary oxygen availability, and FSOC (Fig. 2 and Supplementary Fig. 5). Of the DXA parameters, higher trunk mass correlated significantly with higher intraglomerular pressure (Fig. 2 and Supplementary Fig. 5). Lower DI correlated inversely with higher intraglomerular pressure (*R* = -0.34; *P* = 0.01). Lower AIRg and ACPRg correlated inversely with higher FSOC (Fig. 2 and Supplementary Fig. 5). A sensitivity analysis of youth with T2D excluding those who showed negligible insulin and/or C-peptide responses to hyperglycemia showed similar results in correlation between AIRg and ACPRg with FSOC (data not shown).

### Insulin Secretion, Insulin Sensitivity, and Kidney Function and Energetics in Youth With T2D Stratified by Albuminuria and Glomerular Hyperfiltration

Participants with T2D and albuminuria exhibited higher fat mass and trunk mass and lower FFA suppression, M/I, and DI compared with their peers with T2D without albuminuria (Supplementary Table 1). Fractional cortical oxygen availability was

**Table 1—Participant characteristics stratified by group**

|                                  | NWCs (n = 20)      | OCs (n = 21)      | Youth with T2D (n = 50) | Pairwise difference* | P      |
|----------------------------------|--------------------|-------------------|-------------------------|----------------------|--------|
| Age, years                       | 16.6 ± 3.0         | 16.1 ± 2.1        | 16.4 ± 2.1              | —                    | 0.791  |
| Diabetes duration, years         | NA                 | NA                | 2.3 ± 1.8               | —                    | —      |
| Sex                              |                    |                   |                         | OT†, NO              | 0.016  |
| Female                           | 14 (70)            | 6 (29)            | 30 (60)                 |                      |        |
| Male                             | 6 (30)             | 15 (71)           | 20 (40)                 |                      |        |
| Race/ethnicity                   |                    |                   |                         | NT†, NO              | <0.001 |
| Hispanic or Latino               | 6 (30)             | 15 (71)           | 38 (76)                 |                      |        |
| Not Hispanic or Latino White     | 11 (55)            | 4 (19)            | 4 (8)                   |                      |        |
| Not Hispanic or Latino Black     | 1 (5)              | 1 (5)             | 7 (14)                  |                      |        |
| Not Hispanic or Latino other     | 2 (10)             | 1 (5)             | 1 (2)                   |                      |        |
| BMI, kg/m <sup>2</sup>           | 22.5 ± 3.6         | 37.6 ± 7.4        | 36.4 ± 7.4              | NT†, NO†             | <0.001 |
| Weight, kg                       | 62.1 ± 14.2        | 112.3 ± 23.2      | 104.0 ± 24.6            | NT†, NO†             | <0.001 |
| Height, cm                       | 165.4 ± 10.8       | 172.6 ± 10.8      | 168.5 ± 8.0             | —                    | 0.052  |
| Waist circumference, cm          | 81.5 ± 9.8         | 120.4 ± 15.9      | 114.4 ± 15.5            | NT†, NO†             | <0.001 |
| Tanner stage‡                    |                    |                   |                         | —                    | 0.447  |
| I                                | 0 (0)              | 0 (0)             | 0 (0)                   |                      |        |
| II                               | 1 (7)              | 0 (0)             | 0 (0)                   |                      |        |
| III                              | 0 (0)              | 0 (0)             | 0 (0)                   |                      |        |
| IV                               | 2 (13)             | 1 (8)             | 4 (9)                   |                      |        |
| V                                | 12 (80)            | 12 (92)           | 40 (91)                 |                      |        |
| HbA <sub>1c</sub> , %            | 5.2 (5.1, 5.4)     | 5.4 (5.3, 5.5)    | 6.4 (5.9, 7.6)          | OT†, NT†             | <0.001 |
| SBP, mmHg                        | 118 ± 10           | 127 ± 7           | 124 ± 8                 | NT, NO               | 0.002  |
| DBP, mmHg                        | 70 ± 7             | 70 ± 6            | 73 ± 8                  | —                    | 0.138  |
| Cholesterol, mmol/L              | 146 ± 28           | 158 ± 22          | 162 ± 29                | —                    | 0.091  |
| LDL, mg/dL                       | 92 ± 24            | 111 ± 22          | 109 ± 25                | NT, NO               | 0.017  |
| HDL, mg/dL                       | 46 ± 9             | 37 ± 7            | 38 ± 8                  | NT†, NO†             | <0.001 |
| Baseline triglycerides, mg/dL    | 90 (65, 106)       | 127 (95, 160)     | 160 (109, 197)          | NT†, NO              | <0.001 |
| Estimated insulin sensitivity§   | 9.35 (8.35, 11.63) | 3.98 (3.16, 4.61) | 3.70 (2.54, 4.55)       | NT†, NO†             | <0.001 |
| eGFR, mL/min/1.73 m <sup>2</sup> | 107 (97, 117)      | 115 (103, 124)    | 120 (109, 141)          | NT                   | 0.005  |
| UACR, mg/g                       | 6.5 (4.3, 10.2)    | 5.3 (3.4, 14.3)   | 10.3 (5.9, 58.0)        | OT, NT               | 0.003  |
| Elevated UACR, ≥30 mg/g          | 3 (15)             | 4 (19)            | 15 (30)                 | —                    | 0.365  |
| Hyperfiltration by eGFR¶         | 2 (10)             | 2 (10)            | 16 (32)                 | —                    | 0.045  |
| Hyperfiltration by mGFR¶         | 1 (5)              | 13 (62)           | 26 (54)                 | NT, NO†              | <0.001 |
| Metformin use                    | 0 (0)              | 0 (0)             | 45 (90)                 | OT†, NT†             | <0.001 |
| Insulin use                      | 0 (0)              | 0 (0)             | 18 (36)                 | OT†, NT              | <0.001 |
| SGLT2 inhibitor use              | 0 (0)              | 0 (0)             | 13 (26)                 | OT†, NT              | 0.001  |
| Thiazolidinedione use            | 0 (0)              | 0 (0)             | 8 (16)                  | OT†                  | 0.041  |
| RAAS inhibitor use               | 0 (0)              | 2 (10)            | 6 (12)                  | —                    | 0.359  |
| Statin use                       | 0 (0)              | 0 (0)             | 1 (2)                   | —                    | 1.000  |
| GLP-1 use                        | 0 (0)              | 0 (0)             | 1 (2)                   | —                    | 1.000  |

Continuous variables are shown as mean ± SD or median (25th, 75th percentiles) and were tested using ANOVA or Kruskal-Wallis rank sum test. Categorical variables are shown as n (%) and were tested using  $\chi^2$  or Fisher exact test. DBP, diastolic blood pressure; GLP-1, glucagon-like peptide 1; NO, NWCs vs. OCs; NT, NWCs vs. youth with T2D; OT, OCs vs. youth with T2D; SBP, systolic blood pressure. \*Pairwise comparisons are shown if pairwise test was significant at  $P < 0.05$ . † $P < 0.001$ . ‡Nineteen participants (21%) were missing Tanner stage. Breast Tanner stage was evaluated for female participants, and testicular volume Tanner stage was evaluated for male participants. §SEARCH for Diabetes in Youth study insulin sensitivity score: estimated insulin sensitivity =  $\exp(4.64725 - 0.02032 [\text{waist (cm)}] - 0.09779 [\text{HbA}_{1c} (\%)] - 0.00235 [\text{triglycerides (mg/dL)}])$ . ||Full age spectrum. ¶Hyperfiltration by eGFR defined as eGFR by full age spectrum  $\geq 135$  mL/min/1.73 m<sup>2</sup>, and hyperfiltration by mGFR defined as mGFR  $\geq 2$  SDs above mean body surface area-indexed mGFR of NWCs.

**Table 2—DXA, intraglomerular hemodynamic function, MRI, and hyperglycemic clamp measures by group**

|                                              | NWCs<br>(n = 20)     | OCs<br>(n = 21)          | Youth With T2D<br>(n = 50) | Pairwise difference* | P      |
|----------------------------------------------|----------------------|--------------------------|----------------------------|----------------------|--------|
| <b>DXA</b>                                   |                      |                          |                            |                      |        |
| Lean mass, kg                                | 44 ± 11              | 62 ± 12                  | 56 ± 11                    | NT†, NO†             | <0.001 |
| Fat mass, kg                                 | 19 ± 7               | 51 ± 15                  | 44 ± 15                    | NT†, NO†             | <0.001 |
| Fat percentage, %                            | 30 ± 7               | 45 ± 7                   | 43 ± 7                     | NT†, NO†             | <0.001 |
| Trunk mass, kg                               | 27 ± 8               | 53 ± 11                  | 50 ± 13                    | NT†, NO†             | <0.001 |
| <b>Intraglomerular hemodynamic function</b>  |                      |                          |                            |                      |        |
| GFR, mL/min                                  | 136 ± 22             | 231 ± 60                 | 209 ± 63                   | NT†, NO†             | <0.001 |
| GFR, mL/min/1.73 m <sup>2</sup>              | 139 ± 8              | 168 ± 38                 | 163 ± 42                   | NT, NO               | 0.021  |
| RPF, mL/min                                  | 616 ± 60             | 913 ± 118                | 857 ± 169                  | NT†, NO†             | <0.001 |
| RPF, mL/min/1.73 m <sup>2</sup>              | 624 ± 92             | 681 ± 103                | 663 ± 105                  | —                    | 0.264  |
| FF, %                                        | 23 ± 3               | 23 ± 5                   | 24 ± 6                     | —                    | 0.679  |
| P <sub>GLO</sub> , mmHg                      | 56 ± 4               | 66 ± 6                   | 79 ± 11                    | OT†, NT†             | <0.001 |
| R <sub>A</sub> , dyne × s × cm <sup>−5</sup> | 2,298 ± 397          | 1,114 ± 481              | 865 ± 502                  | NT†, NO†             | <0.001 |
| R <sub>E</sub> , dyne × s × cm <sup>−5</sup> | 1,153 (1,038, 1,252) | 1,195 (989, 1,269)       | 2,166 (1,693, 2,415)       | OT†, NT†             | <0.001 |
| RVR, mmHg/L/min × 1,000                      | 0.08 ± 0.01          | 0.06 ± 0.01              | 0.07 ± 0.01                | OT, NT†, NO†         | <0.001 |
| <b>Multiparametric kidney MRI</b>            |                      |                          |                            |                      |        |
| Average cortex 3D ASL, mL/min/100 g          | 196.9 ± 53.4         | 195.6 ± 45.7             | 217.7 ± 46.2               | —                    | 0.158  |
| Average cortex R2*, s <sup>−1</sup>          | 21.2 ± 2.3           | 18.9 ± 2.2               | 18.0 ± 1.8                 | NT†, NO              | <0.001 |
| Average medulla R2*, s <sup>−1</sup>         | 27.8 ± 3.0           | 24.6 ± 2.8               | 24.5 ± 3.1                 | NT†, NO              | <0.001 |
| Average FSOC medulla, % (weight adjusted)‡   | 4.0 ± 0.6            | 4.2 ± 0.5                | 5.5 ± 0.3                  | —                    | 0.014  |
| <b>Hyperglycemic clamp measures§</b>         |                      |                          |                            |                      |        |
| Fasting FFAs, μmol/L                         | —                    | 641.4 ± 147.6            | 714.3 ± 209.0              | —                    | 0.163  |
| FFA suppression, %                           | —                    | 93.5 (91.4, 94.9)        | 66.6 (36.1, 85.5)          | —                    | <0.001 |
| Fasting insulin, pmol/L                      | —                    | 17.5 (12.0, 24.5)        | 17.0 (8.8, 25.8)           | —                    | 1.000  |
| Steady-state insulin, pmol/L                 | —                    | 1,233.0 (832.5, 1,488.0) | 205.5 (81.8, 402.8)        | —                    | <0.001 |
| Steady-state C-peptide, nmol/L               | —                    | 16.8 ± 4.5               | 8.1 ± 4.6                  | —                    | <0.001 |
| Insulin-to-C-peptide ratio                   | —                    | 72.5 (60.5, 90.5)        | 27.1 (17.5, 43.8)          | —                    | <0.001 |
| M value, mg/kg lean/min                      | —                    | 9.6 ± 3.3                | 3.6 ± 2.7                  | —                    | <0.001 |
| M/I, (mg/kg lean/min)/pmol/L                 | —                    | 0.008 (0.005, 0.010)     | 0.011 (0.006, 0.022)       | —                    | 0.062  |
| DI, ×10 <sup>3</sup> mg/kg lean/min          | —                    | 3.8 (2.4, 4.5)           | 0.6 (0.0, 1.6)             | —                    | <0.001 |
| AIIRg, pmol/L                                | —                    | 471.0 (250.8, 591.0)     | 31.8 (0.0, 113.0)          | —                    | <0.001 |
| ACPRg, nmol/L                                | —                    | 5.3 (4.3, 6.9)           | 0.6 (0.3, 1.4)             | —                    | <0.001 |

Continuous variables are shown as mean ± SD or median (25th, 75th percentiles) and were tested using ANOVA or Kruskal-Wallis rank sum test. Categorical variables are shown as n (%) and were tested using  $\chi^2$  or Fisher exact test. FF, filtration fraction; NO, NWCs vs. OCs; NT, NWCs vs. youth with T2D; OT, OCs vs. youth with T2D; P<sub>GLO</sub>, glomerular pressure; R<sub>A</sub>, afferent arteriolar resistance; R<sub>E</sub>, efferent arteriolar resistance; RVR, renal vascular resistance. \*Pair abbreviations are shown if pairwise test was significant at  $P < 0.05$ . † $P < 0.001$ . ‡Weight-adjusted average FSOC mean shown as adjusted mean ± SE. §Hyperglycemic clamp measures not performed in NWCs.

numerically lower in participants with T2D and in participants with albuminuria compared with those without albuminuria, indicating relative hyperoxia in albuminuria, although these relationships were not statistically significant.

After stratifying youth with T2D by glomerular hyperfiltration status, we found lower medullary fractional oxygen availability in those with hyperfiltration compared with in those without, although this only achieved statistical significance in the left kidney (Supplementary Table 2).

## CONCLUSIONS

The current study highlights a substantial prevalence of glomerular hyperfiltration, intraglomerular hypertension, and elevated albuminuria among young individuals with T2D, conditions associated

with central adiposity and parameters of impaired insulin sensitivity and insulin secretion. Uniquely, to our knowledge, this is the first study integrating iohexol, PAH, and hyperglycemic clamps in youth with T2D and the first to compare these individuals with OCs and NWCs. Additionally, using multiparametric MRI, we observed the novel finding of cortical and medullary hyperoxia in both young individuals with T2D and OCs. Moreover, higher FSOC was associated with lower insulin secretion in young individuals with T2D and obesity.

The current study used functional methods to achieve a deeper understanding of the relationship between early kidney injury, obesity, IR, and  $\beta$ -cell dysfunction in youth with T2D. Glomerular hyperfiltration is prevalent in youth with T2D, serving as

an early marker of DKD. The kidneys' high metabolic activity, essential for filtration, intrarenal hemodynamic function, and tubular reabsorption, makes them susceptible to oxidative stress and ultimately hypoxia (typically later in the disease stage) (19,20,27). Hypoxia can arise from an imbalance between kidney oxygen delivery and demand and is increasingly proposed as a common pathway in the development of DKD (28,29). Animal studies of T2D suggest that the kidneys are unable to compensate adequately for increased oxygen consumption early in the disease (30–32). In this study, we found the highest medullary oxygen consumption in youth with T2D. This aligns with experimental models and published kidney biopsy data from a small subset of participants in Renal-HEIR.

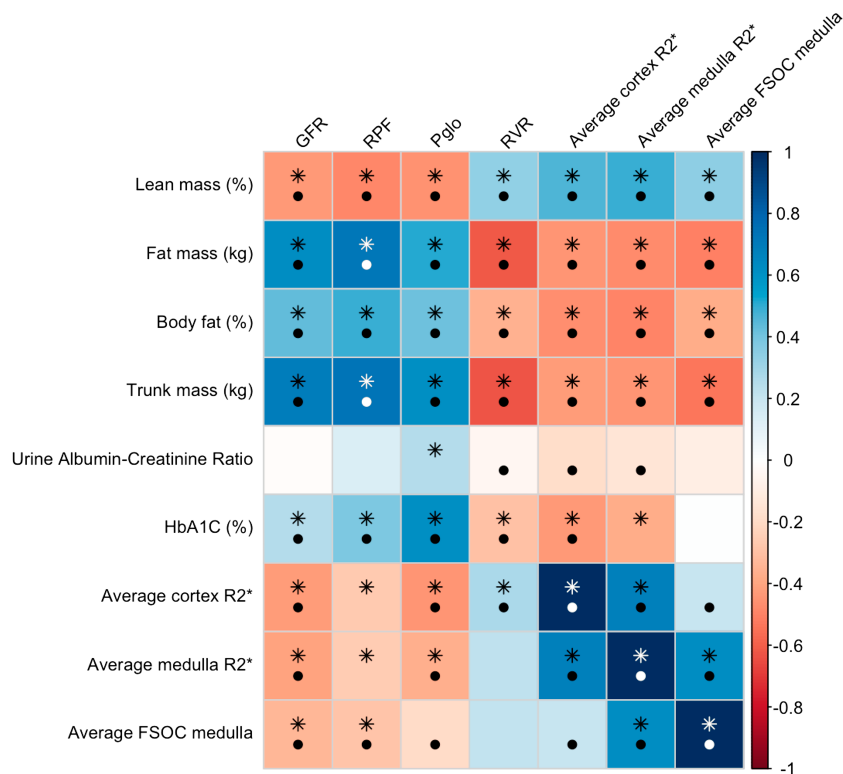

**Figure 1**—Correlation heatmap of all participants combined and multivariable linear regression. Color gradient represents the direction of correlation, with negative correlations depicted in red and positive correlations in blue. Spearman correlation analysis was performed to assess the relationship for UACR and HbA<sub>1c</sub>. Significant correlation coefficients ( $P < 0.05$ ) are denoted by stars. Significant associations in multivariable linear regression models, adjusted for sex and HbA<sub>1c</sub> (or sex alone in models with HbA<sub>1c</sub>), are indicated by dots ( $P < 0.05$ ). Pglo, glomerular pressure; RVR, renal vascular resistance.

Biopsy data from this subset revealed transcriptional changes across most kidney segments, indicative of hypermetabolism (33). Indeed, the transcriptional changes observed in youth with T2D showed increased glycolysis,  $\beta$ -oxidation, and TCA cycle activity in the kidney (33).

However, in the current study, we also documented higher cortical and medullary oxygen availability (lower R2\* values) in youth with T2D and/or obesity, suggesting relative hyperoxia. Given glomerular hyperfiltration, hypermetabolism, and increased oxygen consumption, we expected lower instead of higher oxygen availability. The exact etiology of this apparent hyperoxia remains unclear, but it could potentially be ascribed to impaired oxygen use and might also represent a higher set point of cortical and medullary oxygenation in early DKD in youth with T2D (34). In a prior study, we found that adults with T1D and early DKD also demonstrated medullary hyperoxia compared with NWCs (35).

Additionally, a study in 24 patients with T1D or T2D showed that medullary hyperoxia at baseline was associated with a greater annual loss in eGFR, indicating that medullary hyperoxia might be important for the progression of early DKD (34). Experimental models have implicated hyperoxia in generating reactive oxygen species, disturbance of antioxidant balance, and induction of mitochondrial stress, all of which can lead to hyperoxia-induced cellular compromise, although this has yet to be examined in clinical studies of DKD (36).

Higher intraglomerular pressure was observed in both youth with T2D and OCs, although it was significantly higher in those with diabetes. The higher intraglomerular pressure in youth with T2D compared with in OCs seemed to result from greater efferent arteriolar tone. The higher efferent arteriolar tone in youth with T2D may have been influenced by the compounded effects of  $\beta$ -cell dysfunction and IR (37), potentially altering the RAAS, although delineating

these specific mechanisms will require additional distinct research projects for conclusive evidence. It is also worth noting that SGLT2 inhibitors are thought to attenuate intraglomerular hypertension in T2D by postglomerular vasodilation (i.e., modulation of efferent arteriolar tone) (38). Our findings underscore the role of obesity in contributing to kidney disease in youth, even in individuals without diabetes (39). Although obesity does not fully account for the severity and progression disparities of T2D in youth versus adults, weight loss can bring about significant positive changes (40). These observations offer promise for gut hormone-based therapies, such as glucagon-like peptide 1 and glucagon-like peptide 1/glucose-dependent insulinotropic polypeptide receptor agonists, in protecting against early kidney disease in youth with obesity both with and without T2D.

There are strengths of this study worth highlighting. To limit physiological variability, our study procedures were performed under standardized conditions. The direct assessments of GFR and RPF provided an accurate ascertainment of intraglomerular hemodynamic function, and the hyperglycemic clamp permitted assessment of insulin secretion and sensitivity. The multiparametric MRI analyses provided estimates of perfusion and oxygen availability. Despite these strengths, our study has certain limitations. The cross-sectional design precludes the ability to ascertain causal relationships. However, we are actively observing many of these participants through a longitudinal observational study. Moreover, our sample size, particularly for the OCs and NWCs, was relatively small, which may limit the generalizability of our findings as well as the statistical power. Furthermore, our findings might not be applicable to youth with T2D exhibiting poorer glycemic control, even though our participants had control levels similar to those reported in the TODAY study for youth with comparable disease duration (5). Significant discrepancies in hyperfiltration rates were evident in OCs between GFR estimates from creatinine, cystatin C, and iothexol clearance, especially pronounced in OCs, suggesting potential eGFR inaccuracies in participants with high BMI. Additionally, BOLD MRI generates an indirect measure of oxygen availability based on the relaxation rate of deoxygenated

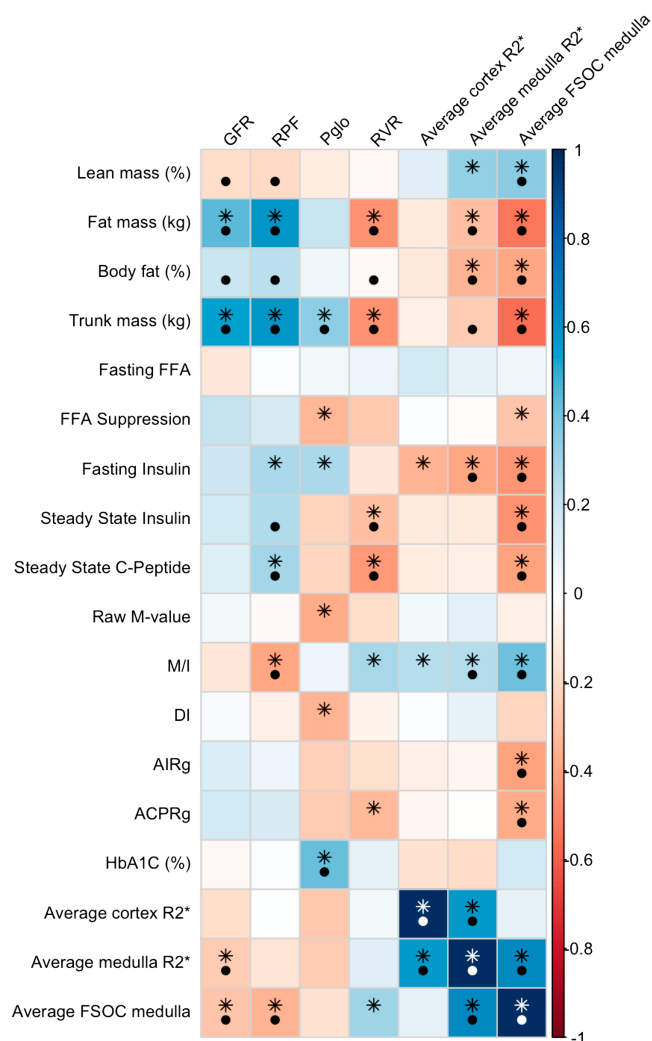

**Figure 2**—Correlation heatmap limited to youth with T2D and OCs and multivariable linear regression. Color gradient represents the direction of correlation, with negative correlations depicted in red and positive correlations in blue. Spearman correlation analysis was performed to assess the relationships for FFA suppression, fasting insulin, steady-state insulin, M/I, DI, AlRg, ACPRg, and HbA<sub>1c</sub>. Significant correlation coefficients ( $P < 0.05$ ) are denoted by stars. Significant associations in multivariable linear regression models, adjusted for sex and HbA<sub>1c</sub> (or sex alone in models with HbA<sub>1c</sub>), are indicated by dots ( $P < 0.05$ ). Pglo, glomerular pressure; RVR, renal vascular resistance.

hemoglobin. It is confounded by factors such as tissue fluid and acid levels. Another limitation is the use of a hyperglycemic clamp rather than a hyperinsulinemic-euglycemic clamp to assess insulin sensitivity, but hyperglycemic clamps are also validated for this purpose and have the advantage of simultaneously assessing insulin secretion and allowing the controlled hyperglycemia needed for the kidney measures. Despite the limitations, this study represents the most comprehensive assessment of kidney function in youth with T2D to date.

In conclusion, intraglomerular hypertension and perturbed energetics are common in youth with T2D and associated

strongly with obesity and parameters of insulin secretion and sensitivity. Further work is required to understand the relationship between these early pathophysiological factors and future clinical risk in order to design targeted early therapeutic interventions that are critical to prevent adult-onset kidney complications. In future studies, we will delve deeper into the multifactorial pathogenesis of DKD in youth-onset T2D.

**Funding.** This work was supported by the National Institute of Diabetes and Digestive and Kidney Diseases (NIDDK), National Institutes of Health (grant K23 DK116720), as well as the Boettcher Foundation. P.B. receives

salary and research support from the NIDDK (grants DK132399, DK129211, DK129720, and DK116720), the National Heart, Lung, and Blood Institute (grant HL165433), JDRF (grants 3-SRA-2022-1097-M-B, 3-SRA-2022-1230-M-B, 3-SRA-2022-1243-M-B, and 3-SRA-2023-1373-M-B), the American Heart Association (grant 20IPA35260142), and the American Diabetes Association (grants 7-23-ICTST2DY-08 and 7-23-ICTST2DY-01). A.S. has received support from the Foundation for the National Institutes of Health. K.J.N. has received device and drug donations from Abbott and Novo Nordisk.

**Duality of Interest.** P.B. reports serving or having served as a consultant for AstraZeneca, Bayer, Bristol-Myers Squibb, Boehringer Ingelheim, Eli Lilly, LG Chemistry, Sanofi, Novo Nordisk, and Horizon Pharma and on the advisory boards and/or steering committees of AstraZeneca, Bayer, Boehringer Ingelheim, Novo Nordisk, and XORTX Therapeutics. D.C. has received honoraria from Boehringer Ingelheim, Eli Lilly, Merck, AstraZeneca, Sanofi, Mitsubishi Tanabe Pharma, AbbVie, Janssen, Bayer, Prometic, Bristol-Myers Squibb, Maze Therapeutics, CSL-Behring, Otsuka Pharmaceutical, Novartis, Yeungene, and Novo Nordisk and has received operational funding for clinical trials from Boehringer Ingelheim, Eli Lilly, Merck, Janssen, Sanofi, AstraZeneca, and Novo Nordisk. A.S. reports personal fees from Horizon Therapeutics, CVS Caremark, AstraZeneca, Bayer, and Tate and Latham (medicolegal consulting). R.J.J. reports stock with XORTX Therapeutics, equity with Colorado Research Partners, and honoraria from Horizon Therapeutics. No other potential conflicts of interest relevant to this article were reported.

**Author Contributions.** P.B. designed the study. P.B. and Y.J.C. wrote the manuscript. P.B., Y.J.C., C.P., S.G., I.M., L.R., M.B., G.S., T.D., L.D., K.T., L.L., P.P., R.G.N., R.J.J., and K.J.N. performed the research procedures, researched data, contributed to discussion, and reviewed/edited the manuscript. Y.J.C., T.V., and L.P. assisted in analyses, contributed to discussion, and reviewed/edited the manuscript. A.D., P.N., J.K., H.C.L., D.C., D.H.v.R., A.S., P.S., and R.G.N. contributed to discussion and reviewed/edited the manuscript. P.B. and Y.J.C. are the guarantors of this work and, as such, had full access to all the data in the study and take responsibility for the integrity of the data and the accuracy of the data analysis.

K.J.N. is an editor of *Diabetes Care* but was not involved in any of the decisions regarding review of the manuscript or its acceptance.

## APPENDIX

Bjornstad Lab members include Nicholas Becker, Kyla Best, Carissa Birznies, Michelle Bui, Diego Carrasco, Daniel Casillas, Maureen Flynn, Audrey Gruszczynski, Lucy Hall, Madeline Harbour, Melissa Leroux, Kelly Nash, Nhung Nguyen, Emily Sell, and Callyn Rountree-Jablin.

## References

1. Mayer-Davis EJ, Lawrence JM, Dabelea D, et al.; SEARCH for Diabetes in Youth Study. Incidence trends of type 1 and type 2 diabetes



- among youths, 2002–2012. *N Engl J Med* 2017; 376:1419–1429
2. Tönnes T, Saydah S, Isom S, et al. Projections of type 1 and type 2 diabetes burden in the U.S. population aged <20 years through 2060: the SEARCH for Diabetes in Youth study. *Diabetes Care* 2023;46:313–320
  3. Consortium R; RISE Consortium; RISE Consortium Investigators. Effects of treatment of impaired glucose tolerance or recently diagnosed type 2 diabetes with metformin alone or in combination with insulin glargine on  $\beta$ -cell function: comparison of responses in youth and adults. *Diabetes* 2019; 68:1670–1680
  4. RISE Consortium. Impact of insulin and metformin versus metformin alone on  $\beta$ -cell function in youth with impaired glucose tolerance or recently diagnosed type 2 diabetes. *Diabetes Care* 2018;41:1717–1725
  5. Bjornstad P, Drews KL, Caprio S, et al.; TODAY Study Group. Long-term complications in youth-onset type 2 diabetes. *N Engl J Med* 2021;385: 416–426
  6. Sam S, Edelstein SL, Arslanian SA, et al.; RISE Consortium; RISE Consortium Investigators. Baseline predictors of glycemic worsening in youth and adults with impaired glucose tolerance or recently diagnosed type 2 diabetes in the Restoring Insulin Secretion (RISE) study. *Diabetes Care* 2021;44:1938–1947
  7. Mudaliar S, Alloju S, Henry RR. Can a shift in fuel energetics explain the beneficial cardiorenal outcomes in the EMPA-REG OUTCOME study? A unifying hypothesis. *Diabetes Care* 2016;39: 1115–1122
  8. Nankaku M. Chronic hypoxia and tubulointerstitial injury: a final common pathway to end-stage renal failure. *J Am Soc Nephrol* 2006;17:17–25
  9. Singh DK, Winocour P, Farrington K. Mechanisms of disease: the hypoxic tubular hypothesis of diabetic nephropathy. *Nat Clin Pract Nephrol* 2008;4:216–226
  10. Bjornstad P, Skrtic M, Lytvyn Y, Maahs DM, Johnson RJ, Cherney DZ. The Gomez' equations and renal hemodynamic function in kidney disease research. *Am J Physiol Renal Physiol* 2016;311:F967–F975
  11. Saulnier PJ, Looker HC, Mauer M, et al. Intraglomerular dysfunction predicts kidney failure in type 2 diabetes. *Diabetes* 2021;70: 2344–2352
  12. Tonneijck L, Muskiet MH, Smits MM, et al. Glomerular hyperfiltration in diabetes: mechanisms, clinical significance, and treatment. *J Am Soc Nephrol* 2017;28:1023–1039
  13. Cherney DZ, Perkins BA, Soleymanlou N, et al. Renal hemodynamic effect of sodium-glucose cotransporter 2 inhibition in patients with type 1 diabetes mellitus. *Circulation* 2014; 129:587–597
  14. Dabelea D, Stafford JM, Mayer-Davis EJ, et al.; SEARCH for Diabetes in Youth Research Group. Association of type 1 diabetes vs type 2 diabetes diagnosed during childhood and adolescence with complications during teenage years and young adulthood. *JAMA* 2017;317: 825–835
  15. TODAY Study Group. Rapid rise in hypertension and nephropathy in youth with type 2 diabetes: the TODAY clinical trial. *Diabetes Care* 2013;36:1735–1741
  16. Gaspari F, Perico N, Matalone M, et al. Precision of plasma clearance of iothexol for estimation of GFR in patients with renal disease. *J Am Soc Nephrol* 1998;9:310–313
  17. Jødal L, Brøchner-Mortensen J. Reassessment of a classical single injection  $^{51}\text{Cr}$ -EDTA clearance method for determination of renal function in children and adults. Part I: analytically correct relationship between total and one-pool clearance. *Scand J Clin Lab Invest* 2009;69: 305–313
  18. Battilana C, Zhang HP, Olshen RA, Wexler L, Myers BD. PAH extraction and estimation of plasma flow in diseased human kidneys. *Am J Physiol* 1991;261:F726–F733
  19. Vinovskis C, Li LP, Prasad P, et al. Relative hypoxia and early diabetic kidney disease in type 1 diabetes. *Diabetes* 2020;69:2700–2708
  20. Cherney DZ, Miller JA, Scholey JW, et al. Renal hyperfiltration is a determinant of endothelial function responses to cyclooxygenase 2 inhibition in type 1 diabetes. *Diabetes Care* 2010; 33:1344–1346
  21. Pottel H, Hoste L, Dubourg L, et al. An estimated glomerular filtration rate equation for the full age spectrum. *Nephrol Dial Transplant* 2016;31:798–806
  22. RISE Consortium. Metabolic contrasts between youth and adults with impaired glucose tolerance or recently diagnosed type 2 diabetes: II. observations using the oral glucose tolerance test. *Diabetes Care* 2018;41:1707–1716
  23. RISE Consortium. Metabolic contrasts between youth and adults with impaired glucose tolerance or recently diagnosed type 2 diabetes: I. observations using the hyperglycemic clamp. *Diabetes Care* 2018;41:1696–1706
  24. DeFronzo RA, Tobin JD, Andres R. Glucose clamp technique: a method for quantifying insulin secretion and resistance. *Am J Physiol* 1979;237:E214–E223
  25. Bjornstad P, Maahs DM, Cherney DZ, et al. Insulin sensitivity is an important determinant of renal health in adolescents with type 2 diabetes. *Diabetes Care* 2014;37:3033–3039
  26. Prasad PV, Thacker J, Li LP, et al. Multiparametric evaluation of chronic kidney disease by MRI: a preliminary cross-sectional study. *PLoS One* 2015;10:e0139661
  27. Layton AT, Laghmani K, Vallon V, Edwards A. Solute transport and oxygen consumption along the nephrons: effects of  $\text{Na}^+$  transport inhibitors. *Am J Physiol Renal Physiol* 2016; 311:F1217–F1229
  28. Bjornstad P, Chao LC, Cree-Green M, et al. Youth-onset type 2 diabetes mellitus: an urgent challenge. *Nat Rev Nephrol* 2023;19:168–184
  29. Tommerdahl KL, Kendrick J, Nelson RG, Bjornstad P. Youth versus adult-onset type 2 diabetic kidney disease: insights into currently known structural differences and the potential underlying mechanisms. *Clin Sci (Lond)* 2022;136: 1471–1483
  30. Soltoff SP. ATP and the regulation of renal cell function. *Annu Rev Physiol* 1986;48:9–31
  31. Hesp AC, Schaub JA, Prasad PV, et al. The role of renal hypoxia in the pathogenesis of diabetic kidney disease: a promising target for newer renoprotective agents including SGLT2 inhibitors? *Kidney Int* 2020;98:579–589
  32. Cohen JJ. Is the function of the renal papilla coupled exclusively to an anaerobic pattern of metabolism? *Am J Physiol* 1979;236:F423–F433
  33. Schaub JA, Alakwaa FM, McCown PJ, et al. SGLT2 inhibitors mitigate kidney tubular metabolic and mTORC1 perturbations in youth-onset type 2 diabetes. *J Clin Invest* 2023;133:e164486
  34. Li LP, Thacker JM, Li W, et al. Medullary blood oxygen level-dependent MRI index ( $\text{R}_2^*$ ) is associated with annual loss of kidney function in moderate CKD. *Am J Nephrol* 2020;51:966–974
  35. Laursen JC, Søndergaard-Heinrich N, Haddock B, et al. Kidney oxygenation, perfusion and blood flow in people with and without type 1 diabetes. *Clin Kidney J* 2022;15:2072–2080
  36. Helmerhorst HJ, Schultz MJ, van der Voort PH, de Jonge E, van Westerloo DJ. Bench-to-bedside review: the effects of hyperoxia during critical illness. *Crit Care* 2015;19:284
  37. Yavuz D, Koç M, Toprak A, et al. Effects of ACE inhibition and AT1-receptor antagonism on endothelial function and insulin sensitivity in essential hypertensive patients. *J Renin Angiotensin Aldosterone Syst* 2003;4:197–203
  38. van Bommel EJM, Muskiet MHA, van Baar MJB, et al. The renal hemodynamic effects of the SGLT2 inhibitor dapagliflozin are caused by post-glomerular vasodilatation rather than pre-glomerular vasoconstriction in metformin-treated patients with type 2 diabetes in the randomized, double-blind RED trial. *Kidney Int* 2020;97:202–212
  39. Friedman AN, Schauer PR, Beddhu S, et al. Obstacles and opportunities in managing coexisting obesity and CKD: report of a scientific workshop cosponsored by the National Kidney Foundation and the Obesity Society. *Am J Kidney Dis* 2022;80:783–793
  40. Inge TH, Courcoulas AP, Jenkins TM, et al.; Teen-LABS Consortium. Five-year outcomes of gastric bypass in adolescents as compared with adults. *N Engl J Med* 2019;380:2136–2145
